# Supplementary material
Source: PubMed Central journal article supplement (PMC9446818)
Supplement: NIHMS1799301-supplement-1.pdf [file NIHMS1799301-supplement-1.pdf]

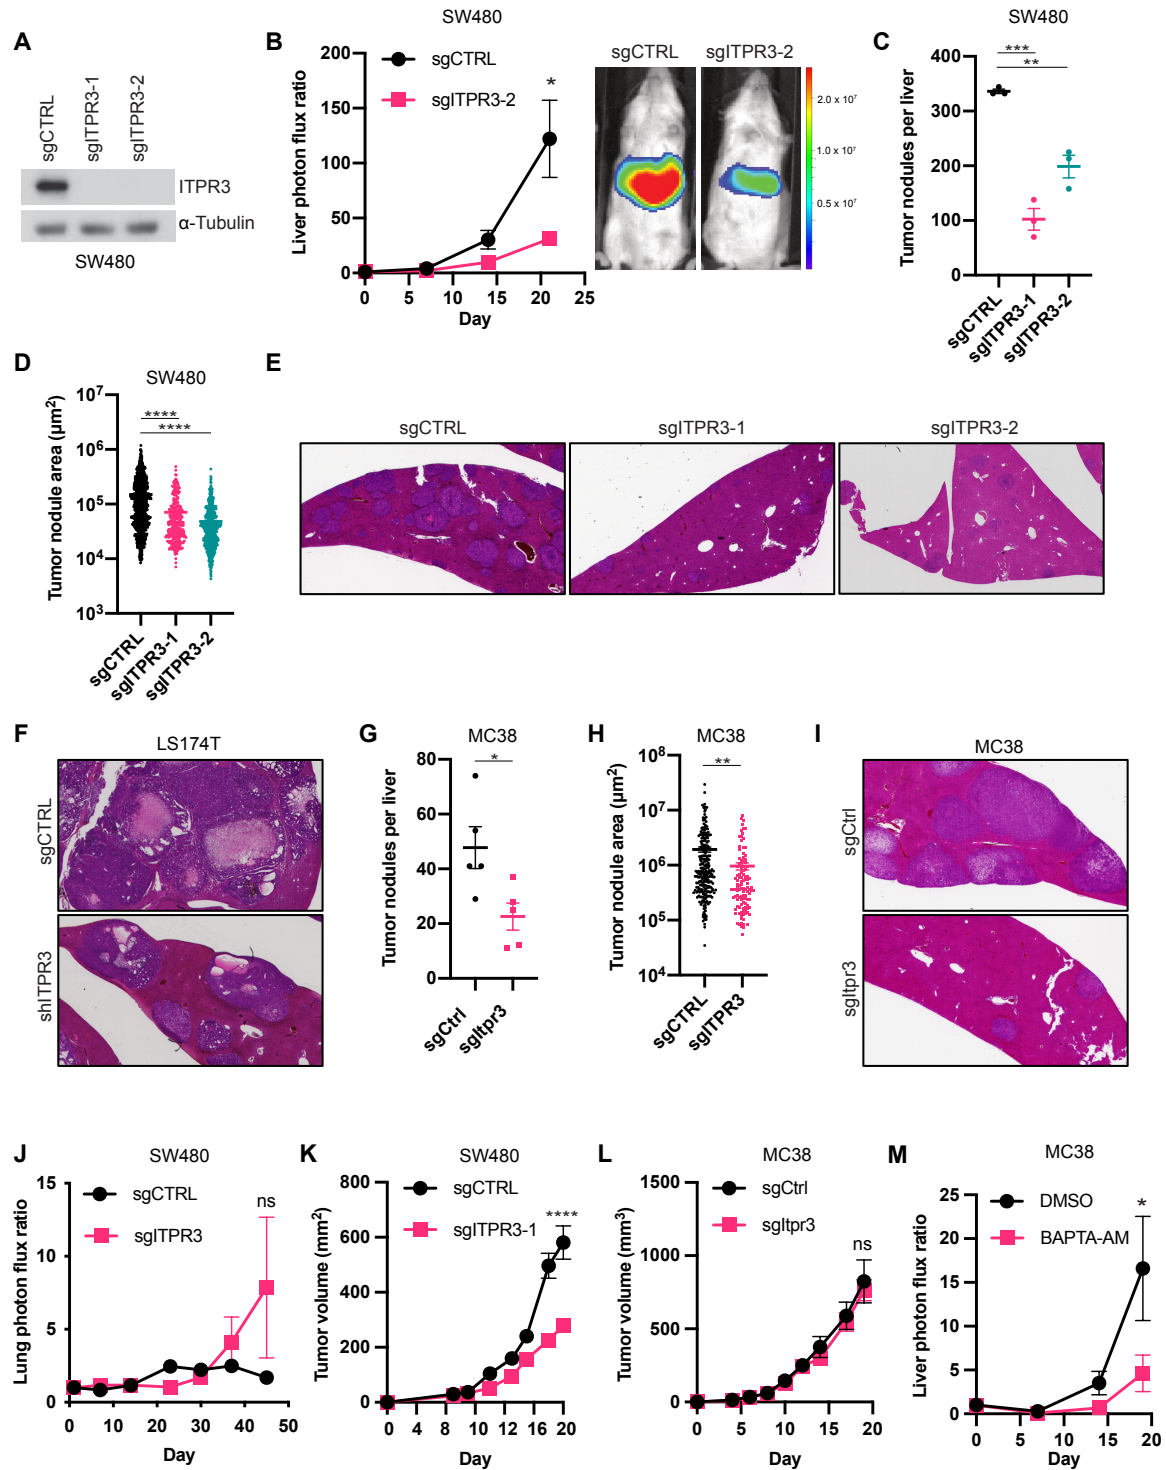

**Figure S1. ITPR3 facilitates metastatic CRC liver colonization, related to Figure 2. (A)** ITPR3 expression by immunoblot in CRISPR-edited sgCTRL or sgITPR3 SW480 cells (two independent

guide RNAs). **(B)**  $5 \times 10^5$  SW480 sgCTRL or sgITPR3-2 cells were inoculated by portal circulation injection, and metastatic colonization was measured by liver bioluminescence at the indicated timepoints (n=4 mice). **(C-E)** Quantification of tumor nodules per liver (C), tumor nodule area (D), and representative H&E staining (E) of livers with sgCTRL or sgITPR3 SW480 metastases. **(F)** Representative H&E staining of livers with shCTRL or shITPR3 LS174T metastases. **(G-I)** Quantification of tumor nodules per liver (G), tumor nodule area (H), and representative H&E staining (I) of livers with sgCtrl or sgItpr3 MC38 metastases. **(J)**  $2 \times 10^5$  SW480 sgCTRL or sgITPR3-1 cells were inoculated by tail vein injection, and lung metastatic burden was monitored by bioluminescence. **(K)**  $5 \times 10^5$  SW480 sgCTRL or sgITPR3-1 cells were injected into the flanks of mice and subcutaneous xenograft volume was monitored. **(L)**  $5 \times 10^5$  SW480 sgCtrl or sgItpr3 MC38 cells were injected into the flanks of mice and subcutaneous xenograft volume was monitored. **(M)** MC38 cells were treated with 20  $\mu$ M BAPTA-AM or DMSO control for two hours prior to portal circulation injection, and metastatic colonization was measured by liver bioluminescence at the indicated timepoints (n = 8 mice). Mean  $\pm$  SEM; \*p < 0.05, \*\*p < 0.01, \*\*\*p < 0.001, \*\*\*\* p < 0.0001, Student's t-test.

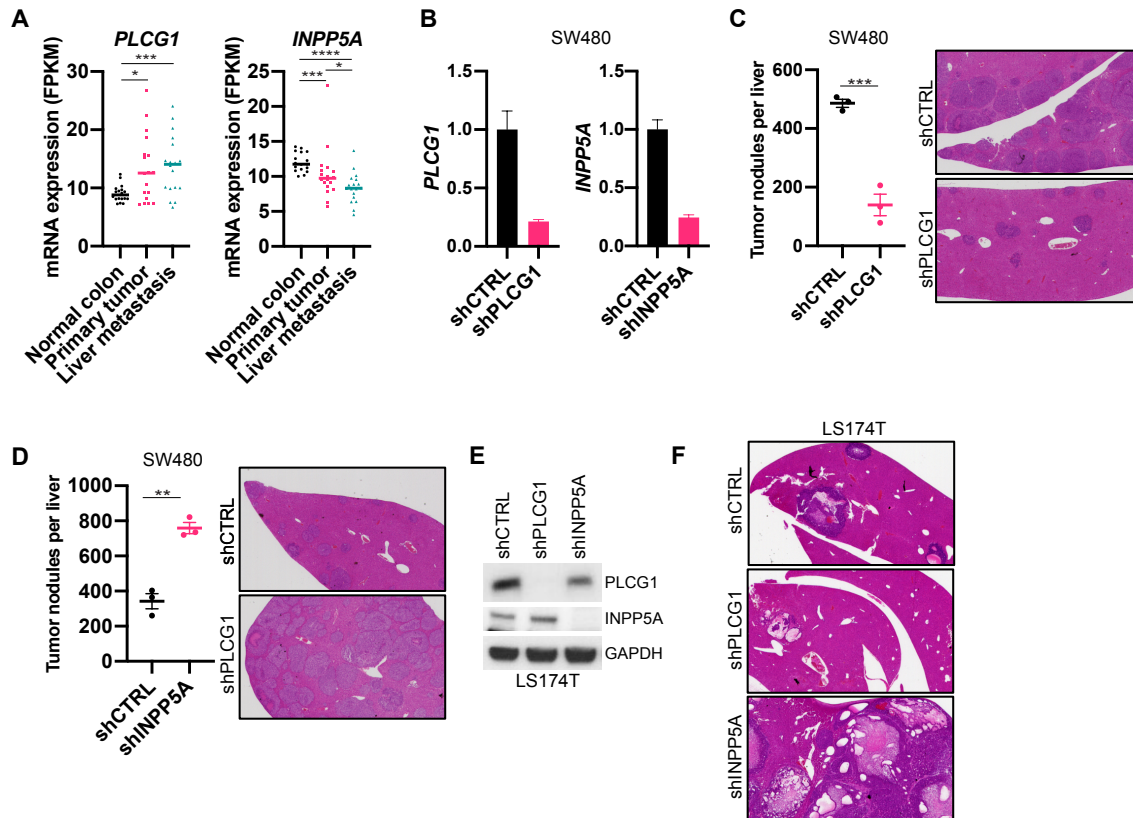

**Figure S2. Expression of genes involved in IP3 signaling and metabolism are modulated in CRC liver metastases, related to Figure 3. (A)** *PLCG1* and *INPP5A* expression as measured by RNA sequencing from normal colon, primary tumors or liver metastases (GSE50760). **(B)** RNA transcript levels of *PLCG1* and *INPP5A* from control or shRNA-expressing SW480 cells as measured by qRT-PCR. **(C)**  $5 \times 10^5$  SW480 cells expressing control or *PLCG1* shRNA were inoculated by portal circulation injection, and metastatic tumor nodules were quantified by H&E staining. **(D)**  $5 \times 10^5$  SW480 cells expressing control or *INPP5A* shRNA were inoculated by portal circulation injection, and metastatic tumor nodules were quantified by H&E staining. **(E)** Immunoblot for *PLCG1* and *INPP5A* protein in LS174T cells expressing the indicated shRNAs. **(F)**  $5 \times 10^5$  LS174T cells expressing control, *PLCG1*, or *INPP5A* shRNA were inoculated by portal circulation injection, and metastatic tumor nodules were quantified by H&E staining. Median (A) or Mean  $\pm$  SEM (C-D); \* $p < 0.05$ , \*\*  $p < 0.01$ , \*\*\*  $p < 0.001$ , \*\*\*\*  $p < 0.0001$ , Mann-Whitney test (A) or Student's t-test (C-D)

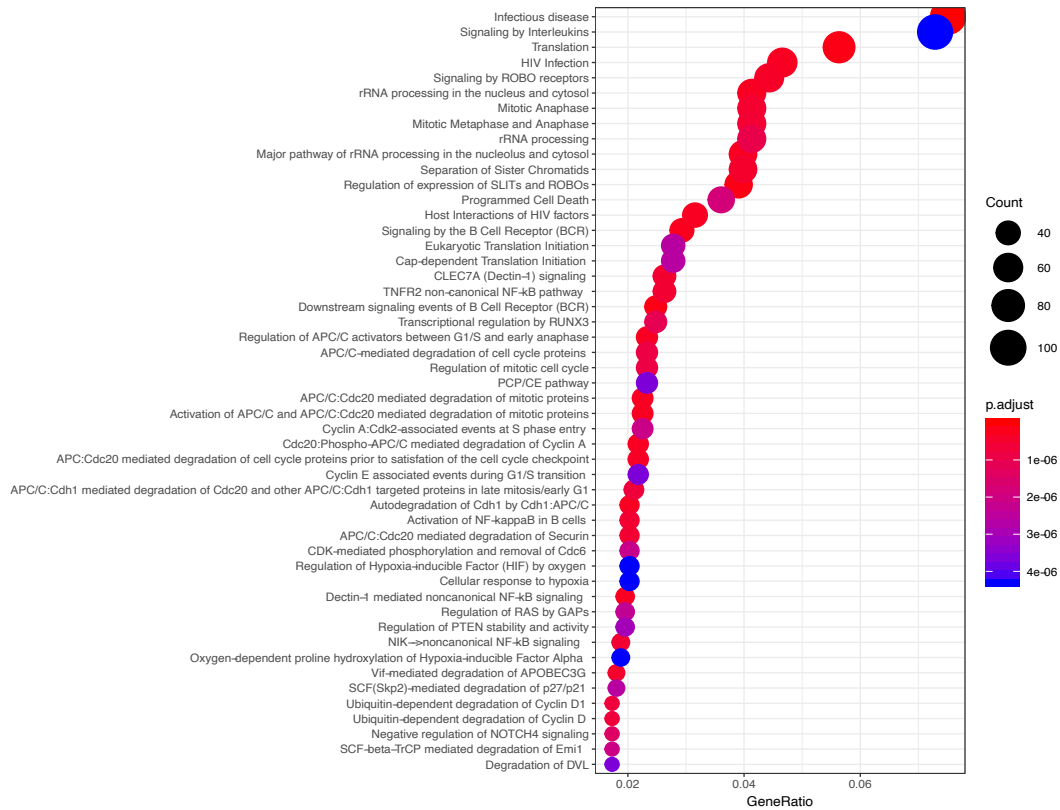

**Figure S3. Transcriptomic analysis of ITPR3-regulated genes in established CRC liver metastases, related to Figure 5.**  $5 \times 10^5$  SW480 sgCTRL or sgITPR3 cells were inoculated by portal circulation injection, and cells were isolated from liver metastases harvested at day 27 prior to RNA-seq. Enrichment of biological pathways among down-regulated genes in *ex vivo* SW480 sgITPR3 cells by Reactome pathway analysis.

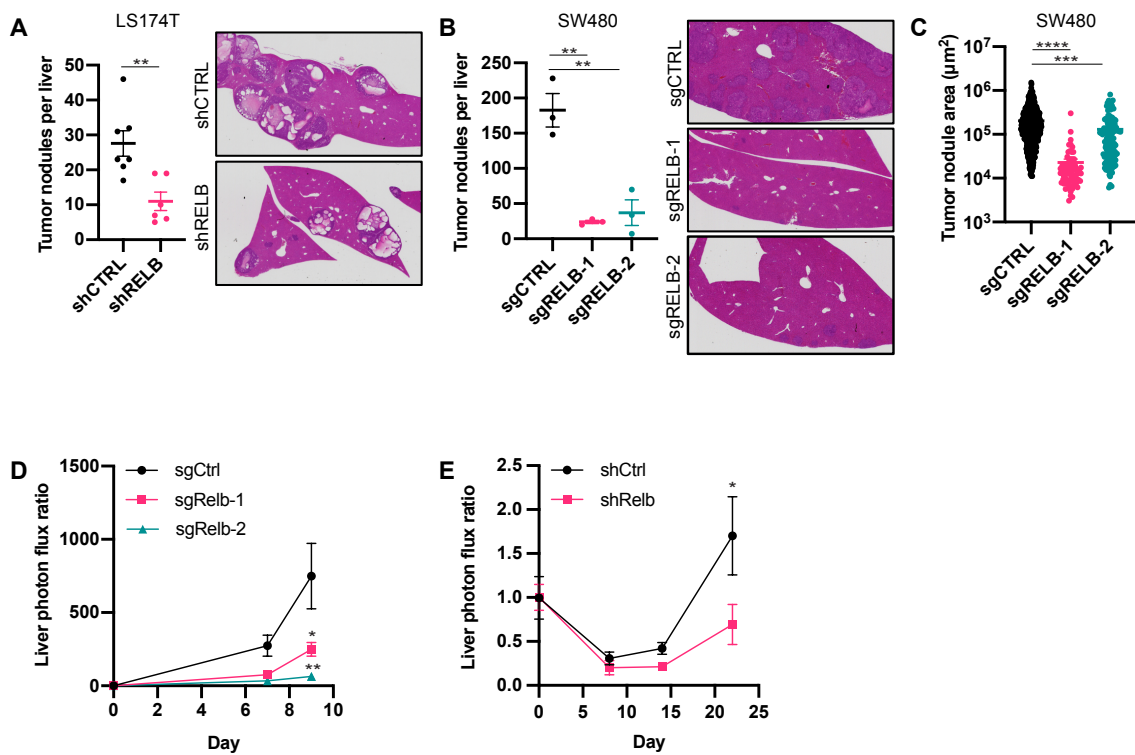

**Figure S4. RELB facilitates metastatic liver colonization, related to Figure 5. (A)**  $5 \times 10^5$  LS174T cells expressing control or RELB shRNA were inoculated by portal circulation injection, and metastatic tumor nodules were quantified by H&E staining. **(B)**  $5 \times 10^5$  SW480 sgCTRL or sgRELB cells were inoculated by portal circulation injection, and metastatic tumor nodules were quantified by H&E staining. **(C)** Tumor nodule area of SW480 sgCTRL or sgRELB liver metastases. **(D)**  $5 \times 10^5$  CT26 cells were inoculated by portal circulation injection, and metastatic liver burden was monitored by bioluminescence. **(E)**  $5 \times 10^5$  MC38 cells were inoculated by portal circulation injection, and metastatic liver burden was monitored by bioluminescence. \* $p < 0.05$ , \*\* $p < 0.01$ , \*\*\* $p < 0.001$ , \*\*\*\* $p < 0.0001$ , Student's t-test.

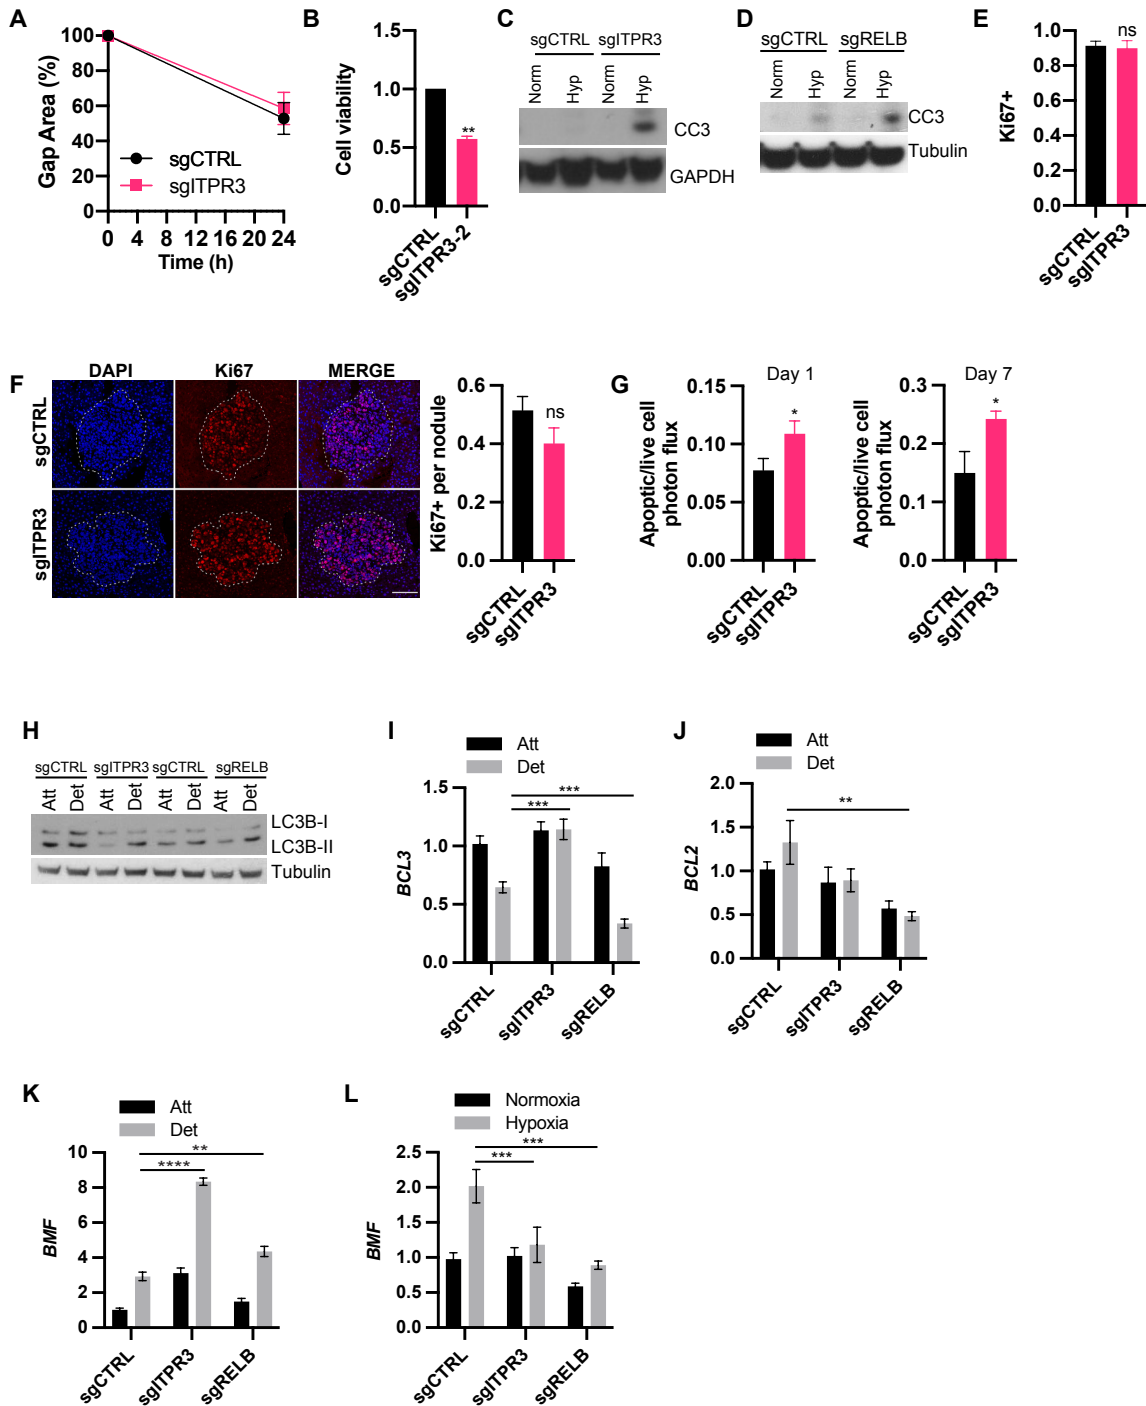

**Figure S5. Effect of ITPR3 deficiency on migration and CRC growth, related to Figure 6. (A)**

A scratch was made through a confluent monolayer of SW480 cells, and migration as measured

by gap area closure was monitored. **(B)** Viability of SW480 cells cultured in ULA plates for 5 days as assessed by ATP-based luminescent cell viability assays (n=3 independent experiments). **(C)** Immunoblot for cleaved caspase-3 levels in sgCTRL or sgITPR3 cells cultured under normoxia or hypoxia (0.5% O<sub>2</sub>) for 48H. **(D)** Immunoblot for cleaved caspase-3 levels in sgCTRL or sgRELB cells cultured under normoxia or hypoxia (0.5% O<sub>2</sub>) for 48H. **(E)** SW480 cells labeled with CellTracker Red (sgCTRL) or Green (sgITPR3) were mixed 1:1, and 1x 10<sup>6</sup> cells were introduced into the portal circulation by splenic injection (n = 5 mice). Livers were harvested at 2H post-inoculation and Ki67+ cells were monitored by immunofluorescence. Fraction of Ki67+ cells among sgCTRL and sgITPR3 cells is shown. **(F)** Representative immunofluorescence images and fraction of Ki67+ cells among sgCTRL and sgITPR3 cells in metastatic tumor nodules. **(G)** 5x10<sup>5</sup> SW480 sgCTRL or sgRELB cells were inoculated by portal circulation injection. Apoptotic cell burden was monitored using DEVD-luciferin bioluminescence relative to live cell bioluminescence over time. **(H)** Immunoblot for LC3 in sgCTRL, sgITPR3, or sgRELB cells cultured under attached or detached conditions for 48H. **(I)** *BCL3* RNA expression by qRT-PCR in cells cultured under attached or detached conditions for 24H. **(J)** *BCL2* RNA expression by qRT-PCR in cells cultured under attached or detached conditions for 24H. **(K)** *BMF* RNA expression by qRT-PCR in cells cultured under attached or detached conditions for 24H. **(L)** *BMF* RNA expression by qRT-PCR in cells cultured under normoxia or hypoxia for 72H. Mean ± SEM; \*p < 0.05; \*\*p < 0.01; \*\*\*p < 0.001, \*\*\*\*p < 0.0001, Student's t-test.

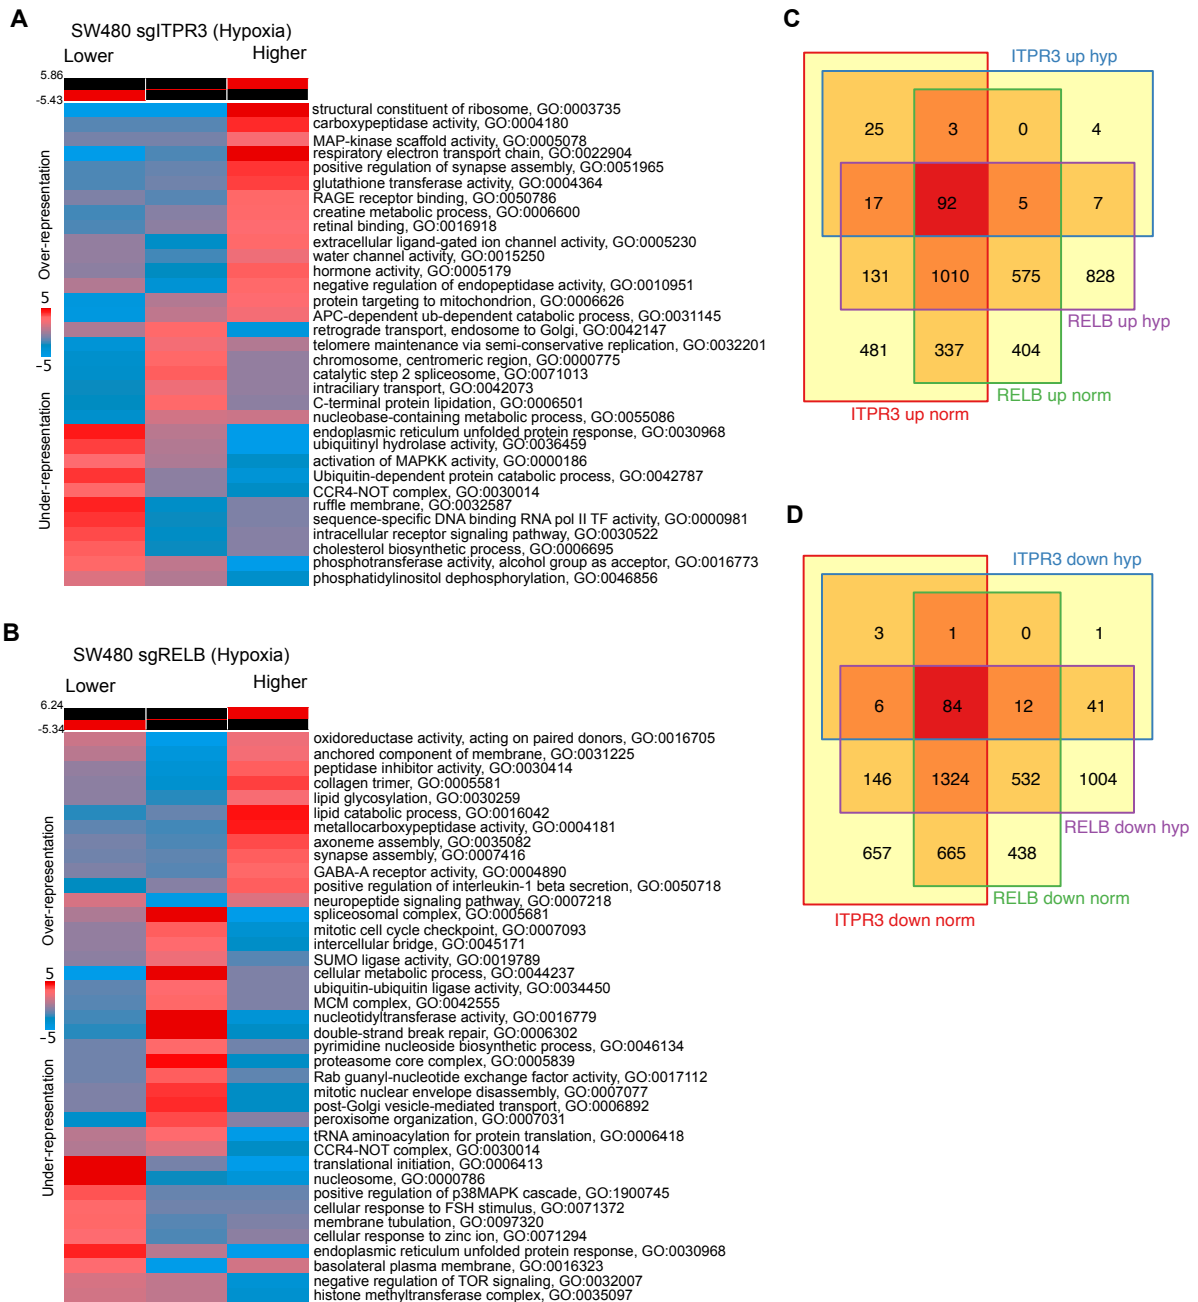

**Figure S6. iPAGE analysis of RNA-seq from ITPR3 and RELB KO cells exposed to hypoxia, related to Figure 6. (A)** iPAGE analysis of SW480 sgITPR3 cells cultured for 72 hours in hypoxia (0.5% O<sub>2</sub>) compared to control cells. **(B)** iPAGE analysis of SW480 sgRELB cells cultured for 72 hours in hypoxia (0.5% O<sub>2</sub>) relative to control cells. **(C-D)** Venn diagram showing number of



overlapping differentially expressed up-regulated (C) and down-regulated (D) genes under normoxia or hypoxia (0.5% O<sub>2</sub> for 72 hours) in ITPR3 and RELB KO SW480 cells relative to control cells.

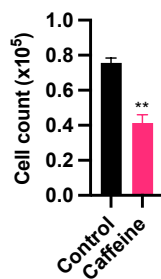

**Figure S7. Caffeine treatment of CRC cells inhibits cell growth under detached conditions, related to Figure 7.** SW480 cells were cultured on ULA plates for 4 days in the absence or presence of caffeine 5 mM. \*\*p < 0.01, Student's t-test.

**Table S5. shRNA and sgRNA sequences, related to the STAR Methods.**

| Name              | shRNA or sgRNA target sequence (5'-3') |
|-------------------|----------------------------------------|
| shCTRL            | CAACAAGATGAAGAGCACCAA                  |
| shITPR3-1 (Human) | CGTGAAGAACAAGACCGACTA                  |
| shITPR3-2 (Human) | GATGACAAGAAGAACAAGTTT                  |
| shRELB-1 (Human)  | AGCCCGTCTATGACAAGAAAT                  |
| shRELB-2 (Human)  | CATGCTTCTGAAGTGGACATA                  |
| shPLCG1 (Human)   | AGAAGTTCCTTCAGTACAATC                  |
| shITPKA (Human)   | CCTTGTGTGCTCGACTGCAAA                  |
| shINPP5A (Human)  | GCGATTCGAGAAGGTTTCCTA                  |
| shRelb (Mouse)    | CGGTTCTCTTTGAGCCCATTT                  |
| sgCTRL            | GCGAGGTATTCGGCTCCGCG                   |
| sgITPR3-1 (Human) | GTCCAGCTTTCTTCACATCG                   |
| sgITPR3-2 (Human) | GCTGGTGGATGACCGCTGTG                   |
| sgRELB-1 (Human)  | GGGGACACTAGTCGGCCCAG                   |
| sgRELB-2 (Human)  | GTGGGGAAAGACTGCACCGA                   |
| sgItpr3 (Mouse)   | CTGGAAGCTTCGGAGCAATG                   |
| sgRelb-1 (Mouse)  | CCTACCAGAGGACATATCCG                   |
| sgRelb-2 (Mouse)  | GTTCAAACGCCACCCTACG                    |

**Table S6. siRNAs, related to the STAR Methods.**

| Gene Symbol                         | Dharmacon Catalog Number |
|-------------------------------------|--------------------------|
| PLK4                                | L-005036-00              |
| DDR2                                | L-003112-00              |
| ADGRG1                              | L-004552-00              |
| RELB                                | L-004767-00              |
| MEF2D                               | L-009884-00              |
| CCL5                                | L-007844-00              |
| CORO1B                              | L-010493-01              |
| ITPR3                               | L-006209-00              |
| PLG                                 | L-006001-00              |
| INSR                                | L-003014-00              |
| UBR4                                | L-014021-01              |
| MST1R                               | L-003157-00              |
| COL6A1                              | L-011620-00              |
| OR10A5                              | L-008750-00              |
| TMEM164                             | L-014805-02              |
| MYH7                                | L-011086-00              |
| GPR173                              | L-005727-00              |
| NOB1                                | L-020594-01              |
| MRPL24                              | L-017442-02              |
| ODAM                                | L-016965-02              |
| IGF1R                               | L-003012-00              |
| CMTM6                               | L-010711-00              |
| FGF8                                | L-013693-00              |
| SPACA1                              | L-013464-02              |
| MTMR9                               | L-019244-00              |
| PRSS37                              | L-025360-00              |
| ON-TARGETplus Non-targeting Control | D-001810-10              |

**Table S7. Primers for qRT-PCR, related to the STAR Methods.**

| Name     | Sequence (5'-3')        |
|----------|-------------------------|
| BCL2_F   | GGAGGATTGTGGCCTTCTTT    |
| BCL2_R   | CATCCCAGCCTCCGTTATC     |
| BCL3_F   | GAACACCGAGTGCCAAGAAACC  |
| BCL3_R   | GCTAAGGCTGTTGTTTTCCACGG |
| BMF_F    | GAGGTACAGATTGCCCGAAA    |
| BMF_R    | CCCCGTTCTGTTCTCTTCT     |
| GAPDH_F  | AGCCACATCGCTCAGACAC     |
| GAPDH_R  | GCCCAATACGACCAAATCC     |
| HPRT_F   | GACCAGTCAACAGGGGACAT    |
| HPRT_R   | CCTGACCAAGGAAAGCAAAG    |
| ITPR3_F  | TATGCAGTTTCGGGACCACC    |
| ITPR3_R  | TGCCCTTGTA CTGTCACAC    |
| PLCG1_F  | CATCTGCCAAAGAATGGCCG    |
| PLCG1_R  | AGTCCATTGTCCACCACAAACT  |
| ITPKA_F  | CTTCGACGGACCTTGTGTG     |
| ITPKA_R  | TACATGTCCTTCCGCAGCTT    |
| INPP5A_F | TTCGACGACCCAGAAAACCT    |
| INPP5A_R | GCCTCGTAGTTCTTCCCTCC    |
| TNF_F    | CTCTTCTGCCTGCTGCACTTTG  |
| TNF_R    | ATGGGCTACAGGCTTGTCACTC  |
| RELB_F   | AAGAAAAAGCCGGCCATC      |
| RELB_R   | CACGGTGCCAGAGAAGAAGT    |
